# Supplementary material for: Nano silver oxide-modified activated carbon as a novel catalyst for efficient removal of bacteria and micropollutants in aquatic environment
Source: Royal Society of Chemistry journal article supplement (doi:10.1039/d4ra04604h), 2024-01-01
Supplement: d4ra04604h1.pdf [file d4ra04604h1.pdf]

1 **Nano silver oxide-modified activated carbon as a novel catalyst for**  
2 **efficient removal of bacteria and micropollutants in aquatic**  
3 **environment**

4

5 Jianping Deng<sup>a, b</sup>, Yong Liu<sup>a, b</sup>, Shuanglin Gui<sup>a, b</sup>, Qizhen Yi<sup>a, b</sup> and Hanbing Nie<sup>a, b\*</sup>

6

7 <sup>a</sup> Institute of Energy Research, Jiangxi Academy of Sciences, Nanchang, 330096,

8 China

9 <sup>b</sup> Jiangxi Carbon Neutralization Research Center, Nanchang, 330096, China

10

11

12

13

14

15

16

17

18

19

20 \*Corresponding author: Institute of Energy Research, Jiangxi Academy of Sciences,

21 Nanchang, 330096, China

22 E-mail address: niehanbing221@126.com

23 **2. Materials and methods**

24 **Text S1**

25 Silver nitrate ( $\text{AgNO}_3$ ,  $\geq 99\%$ ), hydrogen peroxide (30%), Nitric acid, hydrochloric  
26 acid and sodium hydroxide were purchased from Guangzhou Reagent Factory and all  
27 reagents were analytical grade. Tetracycline (TC), tertbutyl alcohol (TBA), p-  
28 benzoquinone (BQ), 5, 5-dimethyl-1-pyrroline N-oxide (DMPO) and catalase were  
29 received from Shanghai Aladdin Reagent Factory. Guangdong Huankai Microbial  
30 Technology Co., Ltd. provided Luria-Bertani (LB) broth, agar powder and  
31 *Escherichia coli* (*E. coli*). Porous activated carbon (AC, 770  $\text{m}^2/\text{g}$  of surface area, 0.1  
32 mm of average diameter) used in this study was obtained from Hongsen Activated  
33 Carbon Co., Ltd.

34 **Text S2**

35 The purchased *E. coli* strain is dry powder in a bottle. The rejuvenation process of  
36 *E. coli* is as follows: the bottle was injected with 1 mL LB culture medium by a  
37 pipette gun and then shaken in a super clean console. After the dry powder was  
38 completely hydrated, it was transferred into the test tube, into which 5 mL LB culture  
39 medium was added. Then the solution was inoculated on LB agar solid medium,  
40 which was put into a constant temperature incubator at 37 °C for 24 h until colonies  
41 grow.

42 The amplification and culture methods of *E. coli* are as follows: A colony of  
43 bacteria from the above rejuvenating medium was taken with an inoculation ring and  
44 inoculated in 100 mL liquid medium. Then the liquid medium was shaken in a

45 constant temperature shaker at 37 °C for 24 h to obtain a bacterial solution with a  
46 concentration of  $10^{11}$  CFU/mL.

47 Plate counting method was adopted for the analysis and identification of *E. coli*:  
48 After sample was diluted to different concentrations, 0.1 mL diluent was taken and  
49 coated evenly on LB agar medium. Then the agar medium was put in an incubator at  
50 37 °C for 24 h and the number of colonies on it was counted. The bacterial  
51 concentration can be calculated by the following formula:

52 Bacterial concentration (CFU/mL) = colony forming units  $\times 10 \times$  dilution times

53 Three parallel plates were made for each diluted sample, and the average value was  
54 used.

### 55 **Text S3**

56 To identify effects of various reactive oxide species (ROS) during the reaction  
57 process, t-butyl alcohol (TBA) as a scavenger of hydroxyl radical ( $\text{OH}^\bullet$ ) was applied  
58 to scavenge the role of generated  $\text{OH}^\bullet$  in reaction <sup>1</sup>. In detail, TBA was injected into  
59 the mixed solution of 100 mL  $\text{H}_2\text{O}$ , 0.1 g  $\text{nAg}_2\text{O}/\text{AC}$ , 0.1 mg TC and 1 mL *E. coli*  
60 ( $10^8$  CFU/mL). After adjusting solution pH value to about 7.0, 32  $\mu\text{L}$   $\text{H}_2\text{O}_2$  (30%) was  
61 added into the mixture solution and then the reactor was shaken at 30°C and 90 rpm to  
62 start reaction. When the reaction for 5 min (or 1, 3, 10 min), 1 mL sample was  
63 immediately collected to detect *E. coli* and TC concentration by the above method and  
64 removal efficiency was calculated to evaluate the effect of  $\text{OH}^\bullet$ . In addition, *p*-  
65 benzoquinone (BQ) and catalase as scavenger for superoxide radicals ( $\text{O}_2^{\bullet-}$ ) and  
66 hydrogen peroxide ( $\text{H}_2\text{O}_2$ ) were also introduced into  $\text{nAg}_2\text{O}/\text{AC}$  heterogeneous

67 Fenton system, respectively, investigating their contribution in the process of  
68 removing pollutants <sup>1</sup>.

69 The generated OH<sup>•</sup> was quantitatively measured through terephthalic acid (TA)  
70 capturing method <sup>2</sup>, herein non-fluorescent TA can react with OH<sup>•</sup> to produce strong  
71 fluorescent hydroxyterephthalic acid (HTA). The concentration of HTA can be  
72 expressed by intensity of fluorescence signal detected by fluorescence spectrometer  
73 and represented the quantity of OH<sup>•</sup> in solution. Briefly, 0.1 g nAg<sub>2</sub>O/AC and 60 mg  
74 TA were mixed into 100 mL of deionized water. Next, 32 μL H<sub>2</sub>O<sub>2</sub> (30%) was  
75 injected and mixed to start the reaction. After reaction for 5 min, samples were taken  
76 out and detected by fluorescence spectrometer (excitation wavelength: 436 nm).  
77 Similarly, the control experiments including nAg<sub>2</sub>O/AC or H<sub>2</sub>O<sub>2</sub> alone system were  
78 also carried out, respectively.

### 79 3. Results and discussion

80 **Table S1** Elemental composition of AC, nAg<sub>2</sub>O and nAg<sub>2</sub>O/AC before and after reaction.

| Sample                 | Elemental (wt%) |      |      |
|------------------------|-----------------|------|------|
|                        | C               | O    | Ag   |
| AC                     | 87.6            | 12.4 | ND   |
| nAg <sub>2</sub> O     | ND              | 12.1 | 87.9 |
| nAg <sub>2</sub> O/AC  | 85.2            | 12.8 | 1.5  |
| nAg <sub>2</sub> O/AC* | 85.9            | 12.7 | 1.4  |

81 ND: not detected; nAg<sub>2</sub>O/AC\*: nAg<sub>2</sub>O/AC after reaction.

82

83

84

85 **Table S2** Kinetic analysis of *E. coli* inactivation experiments

| Sample                                              | Inactivation efficiency<br>(log) | Time<br>(min) | Rate constant<br>(min <sup>-1</sup> ) | R2   |
|-----------------------------------------------------|----------------------------------|---------------|---------------------------------------|------|
| nAg <sub>2</sub> O/AC+H <sub>2</sub> O <sub>2</sub> | 6.0                              | 10            | 0.550                                 | 0.96 |
| nAg <sub>2</sub> O+H <sub>2</sub> O <sub>2</sub>    | 1.8                              | 15            | 0.026                                 | 0.98 |
| AC+H <sub>2</sub> O <sub>2</sub>                    | 0.9                              | 15            | 0.008                                 | 0.99 |
| nAg <sub>2</sub> O/AC                               | 1.2                              | 15            | 0.019                                 | 0.99 |
| H <sub>2</sub> O <sub>2</sub>                       | 0.9                              | 15            | 0.008                                 | 0.98 |

86

87 **Table S3** Kinetic analysis of TC removal experiments

| Sample                                              | Removal efficiency | Time<br>(min) | Rate constant<br>(min <sup>-1</sup> ) | R2   |
|-----------------------------------------------------|--------------------|---------------|---------------------------------------|------|
| nAg <sub>2</sub> O/AC+H <sub>2</sub> O <sub>2</sub> | 98%                | 5             | 0.80                                  | 0.94 |
| nAg <sub>2</sub> O+H <sub>2</sub> O <sub>2</sub>    | 15%                | 10            | 0.04                                  | 0.93 |
| AC+H <sub>2</sub> O <sub>2</sub>                    | 7%                 | 10            | 0.02                                  | 0.96 |
| nAg <sub>2</sub> O/AC                               | 24%                | 10            | 0.07                                  | 0.98 |
| H <sub>2</sub> O <sub>2</sub>                       | 7%                 | 10            | 0.02                                  | 0.97 |

88

89 **Table S4** The summary of *E. coli* inactivation with different Fenton like catalyst

| Catalyst                            | Bacteria       | Inactivation efficiency<br>(log) | Rate constant<br>(min <sup>-1</sup> ) | References   |
|-------------------------------------|----------------|----------------------------------|---------------------------------------|--------------|
| nAg <sub>2</sub> O/AC               | <i>E. coli</i> | 6.0                              | 0.550                                 | present work |
| Fe <sub>2</sub> O <sub>3</sub> /CNT | <i>E. coli</i> | 4.5                              | 0.242                                 | 3            |
| MgO/CNT                             | <i>E. coli</i> | 3.4                              | 0.182                                 | 4            |
| Co <sub>2</sub> O <sub>3</sub> /AC  | <i>E. coli</i> | 5.0                              | 0.391                                 | 5            |
| Mn <sub>2</sub> O <sub>3</sub> /AC  | <i>E. coli</i> | 3.5                              | 0.228                                 | 6            |

90

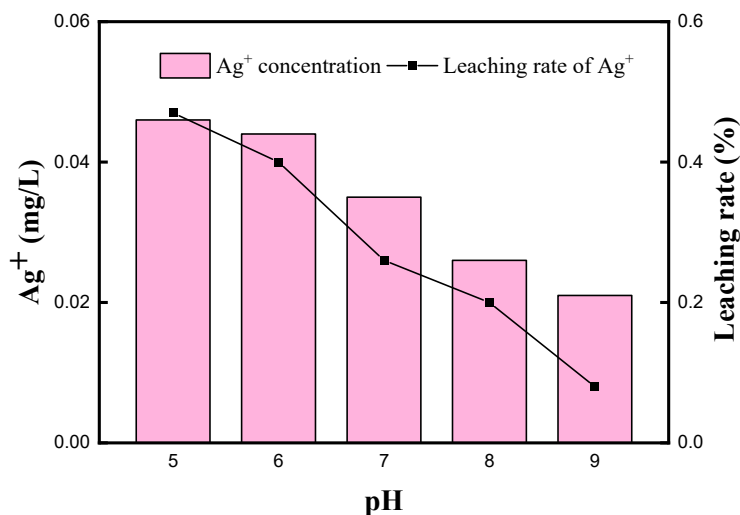

91

92 **Fig. S1.** Leaching concentration and leaching rate of Ag<sup>+</sup> at different pH.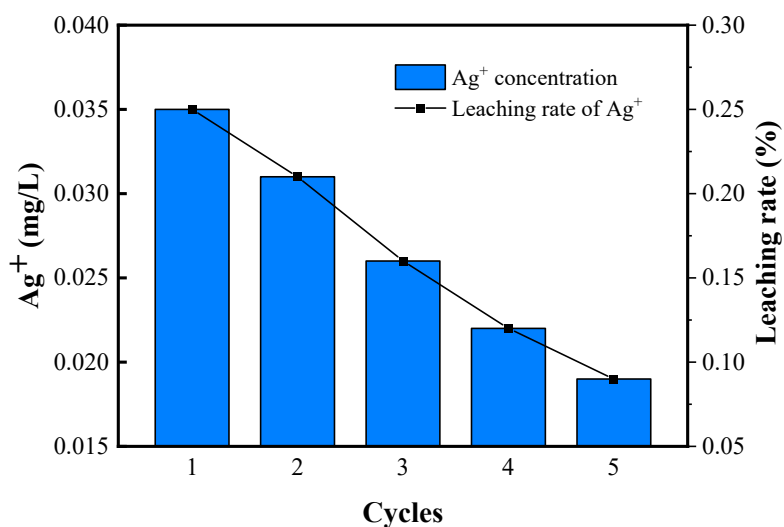

93

94 **Fig. S2.** Leaching concentration and leaching rate of Ag<sup>+</sup> In the cyclic test.

95

96 **References**

- 97 1. Lu, H.; Chen, X.-H.; Mo, C.-H.; Huang, Y.-H.; He, M.-Y.; Li, Y.-W.; Feng, N.-X.;  
98 Katsoyiannis, A.; Cai, Q.-Y., Occurrence and dissipation mechanism of organic pollutants during the  
99 composting of sewage sludge: A critical review. *Bioresource Technology* **2021**, 328.
- 100 2. Yang, B.; Wei, T.; Xiao, K.; Deng, J.; Yu, G.; Deng, S.; Li, J.; Zhu, C.; Duan, H.; Zhuo,

- 101 Q., Effective mineralization of anti-epilepsy drug carbamazepine in aqueous solution by  
102 simultaneously electro-generated H<sub>2</sub>O<sub>2</sub>/O<sub>3</sub> process. *Electrochimica Acta* **2018**, *290*, 203-210.
- 103 3. Zhu, Y.; Zhu, R.; Xi, Y.; Zhu, J.; Zhu, G.; He, H., Strategies for enhancing the heterogeneous  
104 Fenton catalytic reactivity: A review. *Applied Catalysis B-Environmental* **2019**, *255*.
- 105 4. Su, R.; Jin, Y.; Liu, Y.; Tong, M.; Kim, H., Bactericidal activity of Ag-doped multi-walled  
106 carbon nanotubes and the effects of extracellular polymeric substances and natural organic matter.  
107 *Colloids and Surfaces B-Biointerfaces* **2013**, *104*, 133-139.
- 108 5. Srinivasan, N. R.; Shankar, P. A.; Bandyopadhyaya, R., Plasma treated activated carbon  
109 impregnated with silver nanoparticles for improved antibacterial effect in water disinfection. *Carbon*  
110 **2013**, *57*, 1-10.
- 111 6. Pachaiappan, R.; Rajendran, S.; Show, P. L.; Manavalan, K.; Naushad, M., Metal/metal oxide  
112 nanocomposites for bactericidal effect: A review. *Chemosphere* **2021**, *272*.
- 113 7. Salam, M. A.; Obaid, A. Y.; El-Shishtawy, R. M.; Mohamed, S. A., Synthesis of nanocomposites  
114 of polypyrrole/carbon nanotubes/silver nano particles and their application in water disinfection. *Rsc*  
115 *Advances* **2017**, *7* (27), 16878-16884.

116
